# Supplementary material for: Facile and green synthesis of a surfactant-free Au clusters/reduced graphene oxide composite as an efficient electrocatalyst for the oxygen reduction reaction
Source: Royal Society of Chemistry journal article supplement (doi:10.1039/c4ta01417k), 2014-06-24
Supplement: c4ta01417k1.pdf [file c4ta01417k1.pdf]

1 **Supporting Information**

2 **Facile and Green Synthesis of Surfactant-Free**  
3 **Au Clusters/Reduced Graphene Oxide**  
4 **Composite as Efficient Electrocatalyst for**  
5 **Oxygen Reduction Reaction**

6 Shengjie Xu, Peiyi Wu\*

7 Laboratory of Advanced Materials, State Key Laboratory of Molecular Engineering  
8 of Polymers, Department of Macromolecular Science, Fudan University, Shanghai,  
9 200433, P. R. China.

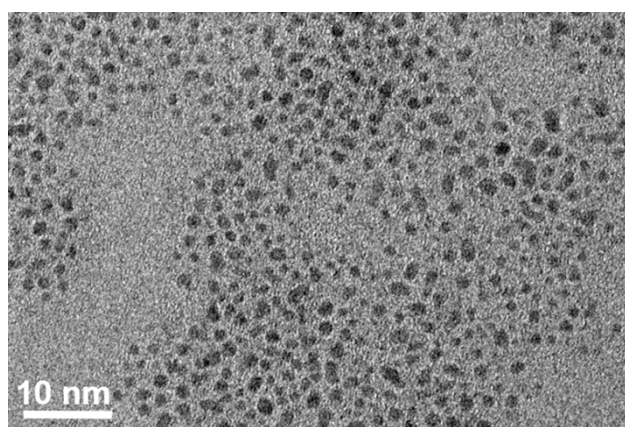

11 **Fig. S1** TEM image of Au clusters prepared with DMF.

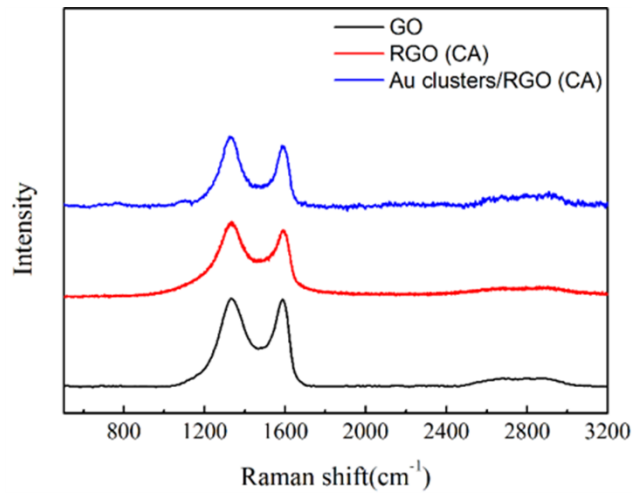

1

2 **Fig. S2** Raman spectra of GO, RGO, and Au clusters/RGO composite prepared with

3 CA.

4

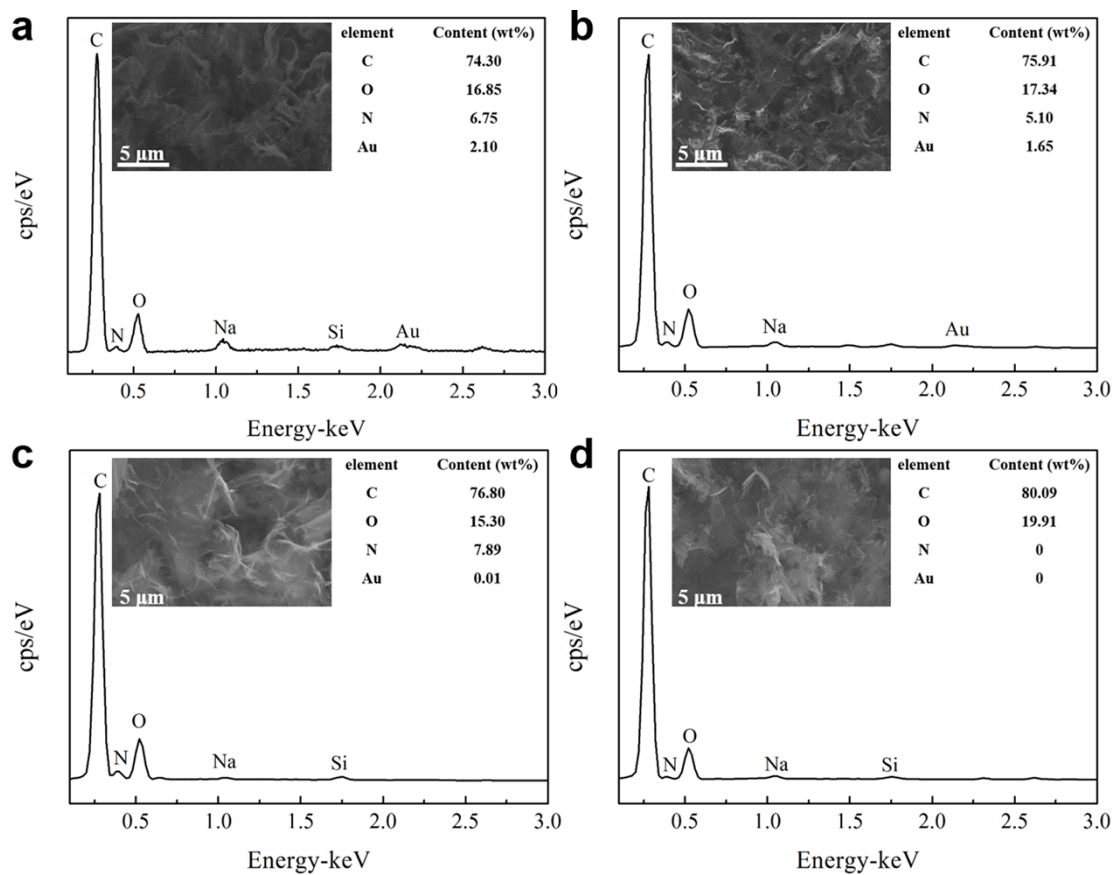

5

6 **Fig. S3** EDS patterns of Au clusters/RGO composites prepared with different agents:

7 (a) CA, (b) AA, (c)  $N_2H_4/NH_3$ , and (d) DMF. The inset shows the SEM image of

8 selected area for EDS and the contents of different elements (C, O, N, and Au).

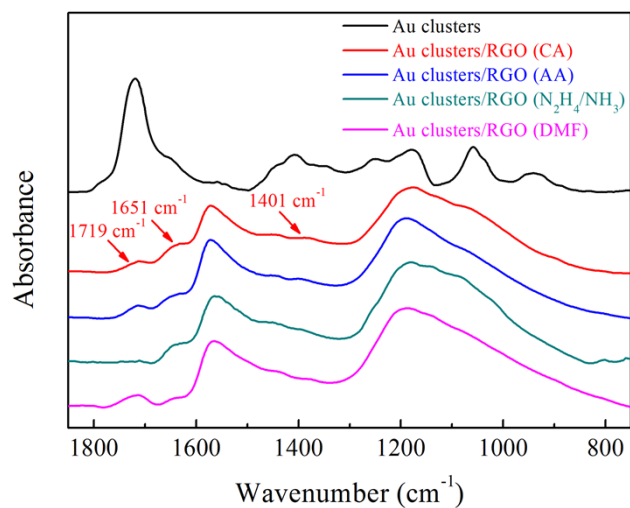

1  
 2 **Fig. S4** FTIR spectra of Au clusters and Au clusters/RGO composites prepared with  
 3 CA, AA N<sub>2</sub>H<sub>4</sub>/NH<sub>3</sub> and DMF.

4  
 5

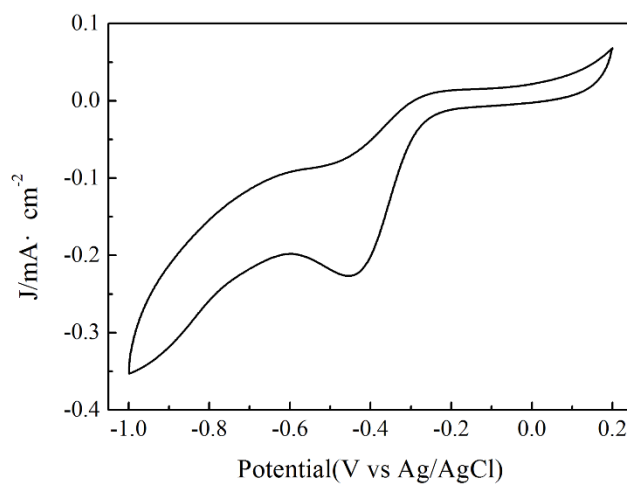

6  
 7 **Fig. S5** CV curve of RGO reduced by CA in O<sub>2</sub> saturated 0.1 M KOH solution.

8

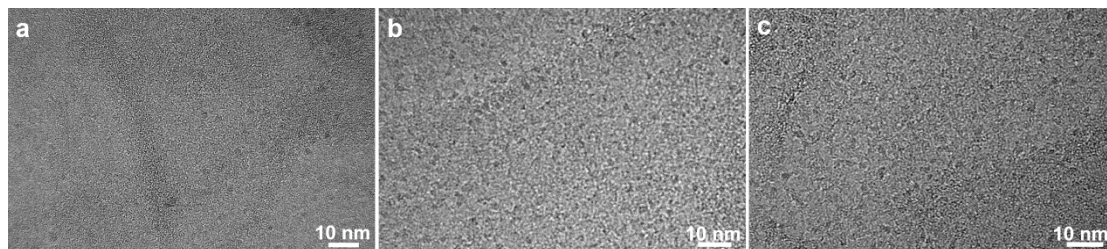

9  
 10 **Fig. S6** (a) TEM image of Au clusters/RGO composites (CA) prepared with different  
 11 ratio of Au cluster: RGO. (a) 1:1; (b) 2.5:1 and (c) 4:1.

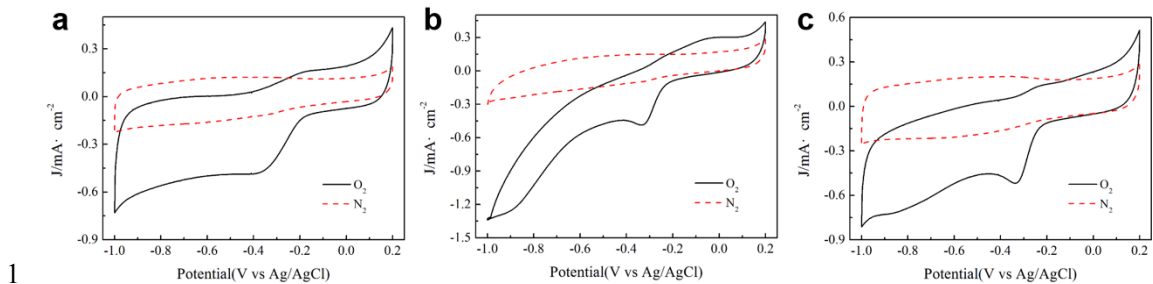

1

2 **Fig. S7** CV curves of Au clusters/RGO composites directly prepared in DMF solution

3 at 140 °C; (b) and (c) CV curves of Au clusters/RGO composites prepared with

4  $\text{N}_2\text{H}_4/\text{NH}_3$  and ascorbic acid (AA). All the ratio of Au clusters: RGO are 5:1.

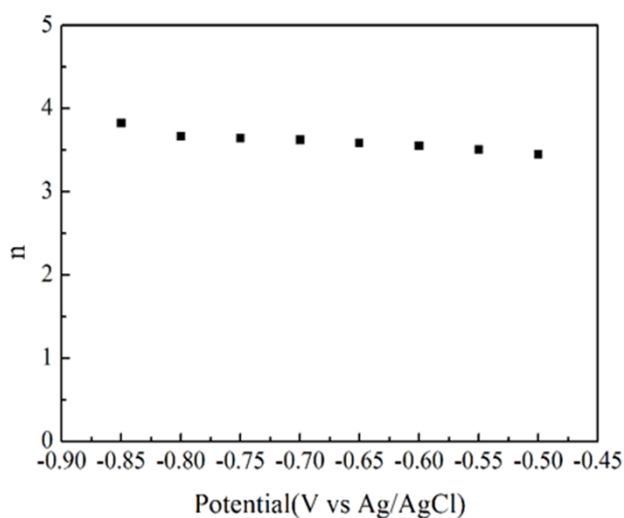

5

6 **Fig. S8** The dependence of  $n$  value for Au clusters/RGO composite (CA) on the

7 potential.

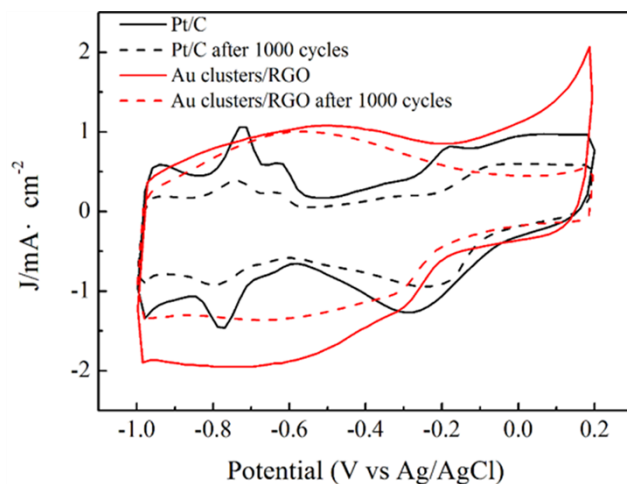

8

9 **Fig. S9** Comparison of the electrochemical stability of commercial Pt/C and Au

1 clusters/RGO composite prepared with CA by continuous cyclic voltammetry in O<sub>2</sub>-  
2 saturated 0.1 M KOH solution

3 **Table S1.** Tentative band assignments of DMF protected Au clusters

| Wavenumber (cm <sup>-1</sup> ) | Assignment                                        |
|--------------------------------|---------------------------------------------------|
| 1719                           | $\nu(\text{C=O})$ of carboxylic acid group        |
| 1651                           | amide I                                           |
| 1557                           | amide II                                          |
| 1441, 1342                     | $\nu(\text{C-H})$                                 |
| 1403                           | $\nu(\text{C-N})$ and CH <sub>3</sub> deformation |
| 1252, 1178                     | $\nu(\text{C-O})$                                 |
| 1057, 1037                     | $\nu(\text{C-N})$ and $\nu(\text{C-H})$           |
| 939                            | $\nu(\text{C-C})$                                 |

4

5

6
